# Supplementary material for: A highly efficient fullerene acceptor for polymer solar cells
Source: Royal Society of Chemistry journal article supplement (doi:10.1039/c4cp00268g), 2014-01-01
Supplement: c4cp00268g1.pdf [file c4cp00268g1.pdf]

## **Supporting Information**

### **A highly efficient fullerene acceptor for polymer solar cells**

**Dan He,<sup>‡</sup> Chuantian Zuo,<sup>‡</sup> Shan Chen, Zuo Xiao\* and Liming Ding\***

*National Center for Nanoscience and Technology, Beijing 100190, China.*

*E-mail: opv.china@yahoo.com, xiaoz@nanoctr.cn*

- 1. General characterization**
- 2. Synthetic procedures and spectral data**
- 3. Device fabrication and measurements**
- 4. NMR spectra**
- 5. *J-V* curves**
- 6. Space charge limited current (SCLC) measurements**
- 7. External quantum efficiency (EQE) spectra**

## 1. General characterization

All reagents were purchased from Aladdin Co., Acros Co. and other commercial suppliers. NMR spectra were measured on a Bruker Avance-400 spectrometer. High resolution ESI mass spectra were measured by a Bruker Apex IV FTMS spectrometer. Absorption spectra were recorded on a Shimadzu UV-1800 spectrophotometer. Cyclic voltammetry (CV) was conducted on a Shanghai Chenhua CHI620D voltammetric analyzer. All measurements were carried out in a one-compartment cell under argon, equipped with a glassy-carbon working electrode, a platinum wire counter electrode, and a Ag/Ag<sup>+</sup> reference electrode. Measurements were performed in ODCB/CH<sub>3</sub>CN (9:1) solution containing tetrabutylammonium hexafluorophosphate (0.1 M) as a supporting electrolyte at 25 °C with a scan rate of 0.1 V/s. All potentials were corrected against Fc/Fc<sup>+</sup>. AFM was performed on a Dimension 3100 microscope (Veeco) (tapping mode). X-ray diffraction (XRD) was performed using a 2 kW Rigaku D/max-2500 X-ray diffractometer in reflection mode (40 kV, 200 mA, Cu K $\alpha$  radiation).

## 2. Synthetic procedures and spectral data

**OQMF70 and bis-OQMF70.** To a solution of C<sub>70</sub>CH<sub>2</sub> (650 mg, 0.76 mmol) in ODCB (130 mL) was added 1,4-dihydrobenzo[d][1,2]oxathiine 3-oxide (325 mg, 1.93 mmol). The mixture was stirred at 100 °C for 4 h. Then the reaction solution was cooled to room temperature and poured into methanol. The crude product was collected by filtration and purified through a silica gel column with CS<sub>2</sub>:hexane (1:1) as the eluent. The first band was the unreacted C<sub>70</sub>CH<sub>2</sub>. The second band was collected to give OQMF70 (380 mg, yield: 52%). The third band was collected to give bis-OQMF70 (276 mg, yield: 34%).

**OQMF70.** <sup>1</sup>H NMR (400 MHz, CDCl<sub>3</sub>):  $\delta$  (ppm) 7.10-7.55 (m, 4H, Ar), 2.42-4.14 (m, 6H, CH<sub>2</sub>). ESI-HRMS (+): C<sub>79</sub>H<sub>10</sub> [M<sup>+</sup>] calc. 958.0783, found 958.0754.

**bis-OQMF70.**  $^1\text{H}$  NMR (400 MHz,  $\text{CDCl}_3$ ):  $\delta$  (ppm) 7.21-7.65 (m, 8H, Ar), 2.15-4.12 (m, 10H,  $\text{CH}_2$ ). ESI-HRMS (+):  $\text{C}_{87}\text{H}_{18}$  [ $\text{M}^+$ ] calc. 1062.1409, found 1062.1435.

### 3. Device fabrication and measurements

#### Conventional solar cells

Patterned ITO glass with a sheet resistance of  $15\ \Omega\ \text{sq}^{-1}$  was cleaned by ultrasonics in detergent, deionized water, acetone, isopropanol sequentially and then treated with UV-ozone for 10 min. A 30 nm thick poly(3,4-ethylenedioxythiophene)-polystyrene sulfonic acid (PEDOT:PSS, Clevios<sup>TM</sup> P VP AI 4083) layer was formed on ITO substrates by spin coating an aqueous dispersion onto ITO glass (4000 rpm for 30 s). PEDOT:PSS coated substrates were dried at  $150\ ^\circ\text{C}$  for 10 min, and then the substrates were transferred into a  $\text{N}_2$ -filled glove box. A P3HT:fullerene (w/w, 1:0.6) blend in ODCB (24 mg/mL) was spin-coated onto PEDOT:PSS layer (1200 rpm for 60 s). Then the films were annealed at  $150\ ^\circ\text{C}$  for 10 min. The thicknesses of the active layers ( $\sim 100$  nm) were measured by a KLA Tencor D-120 profilometer. Finally, Ca ( $\sim 10$  nm) and Al ( $\sim 100$  nm) were thermally evaporated under a shadow mask (pressure ca.  $10^{-4}$  Pa). The effective area for the device is  $4\ \text{mm}^2$ .  $J$ - $V$  curves were measured using a computerized Keithley 2420 SourceMeter. Device characterization was done in air using a Xenon-lamp-based solar simulator (Newport, 91159A, AM 1.5G,  $100\ \text{mW}/\text{cm}^2$ ). Solar simulator illumination intensity was determined using a monocrystalline silicon cell (Oriel 91150,  $2 \times 2\ \text{cm}$ ) calibrated by NREL. The external quantum efficiency (EQE) was measured using a QE-R3011 measurement system (Enli Technology, Inc.).

#### Inverted solar cells

ZnO precursor was prepared according to literature.<sup>[1]</sup> ZnO precursor solution was spin-coated onto ITO glass (4000 rpm for 30 s). The films were annealed at  $200\ ^\circ\text{C}$  for 30 min in air. The thickness of ZnO film is about 30 nm. A P3HT:fullerene (w/w, 1:0.6) blend in ODCB (24 mg/mL) was spin-coated onto ZnO layer (1200 rpm for 60

s). Then the films were annealed at 150 °C for 10 min. MoO<sub>3</sub> (~6 nm) and Ag (~80 nm) was successively evaporated onto the active layer under a shadow mask (pressure ca. 10<sup>-4</sup> Pa).

### Electron-only devices

The structure of electron-only devices is ITO/Al/active layer/Ca/Al. Al (~100 nm) was first evaporated onto glass substrates. A P3HT:fullerene (w/w, 1:0.6) blend in ODCB (24 mg/mL) was spin-coated onto Al (1200 rpm for 60 s). Then the films were annealed at 150 °C for 10 min. Ca (~10 nm) and Al (~100 nm) were thermally evaporated under a shadow mask (pressure ca. 10<sup>-4</sup> Pa). *J-V* curves were measured using a computerized Keithley 2420 SourceMeter.

### 4. NMR spectra

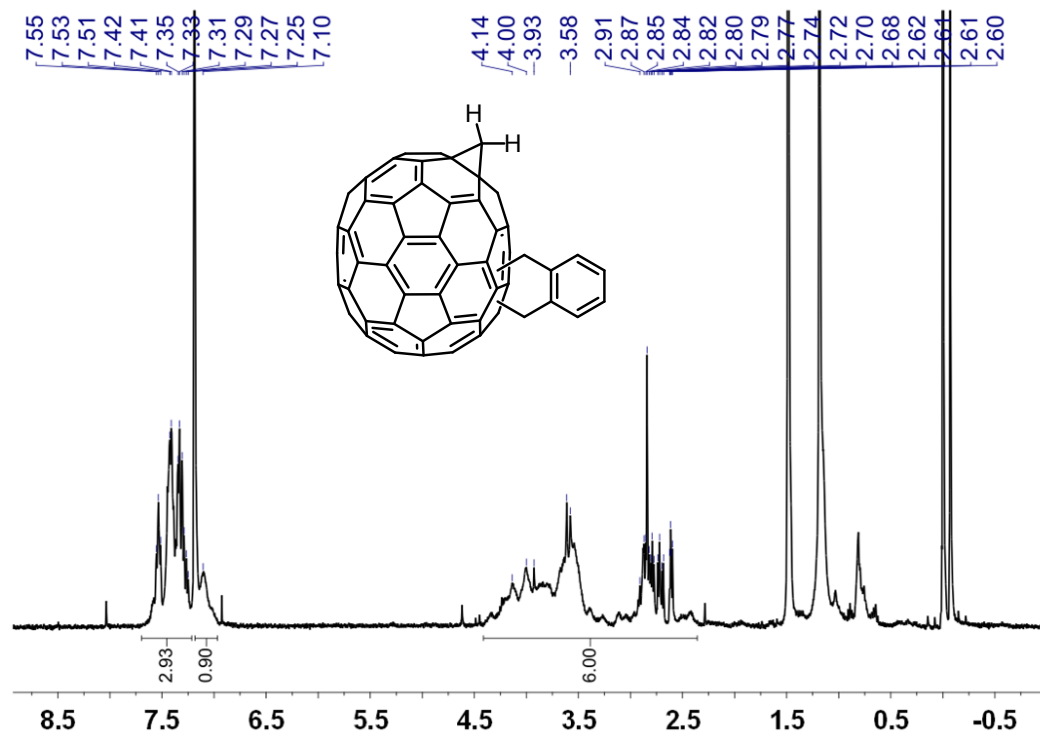

**Figure S1.** <sup>1</sup>H NMR spectrum for OQMF70 in CDCl<sub>3</sub>.

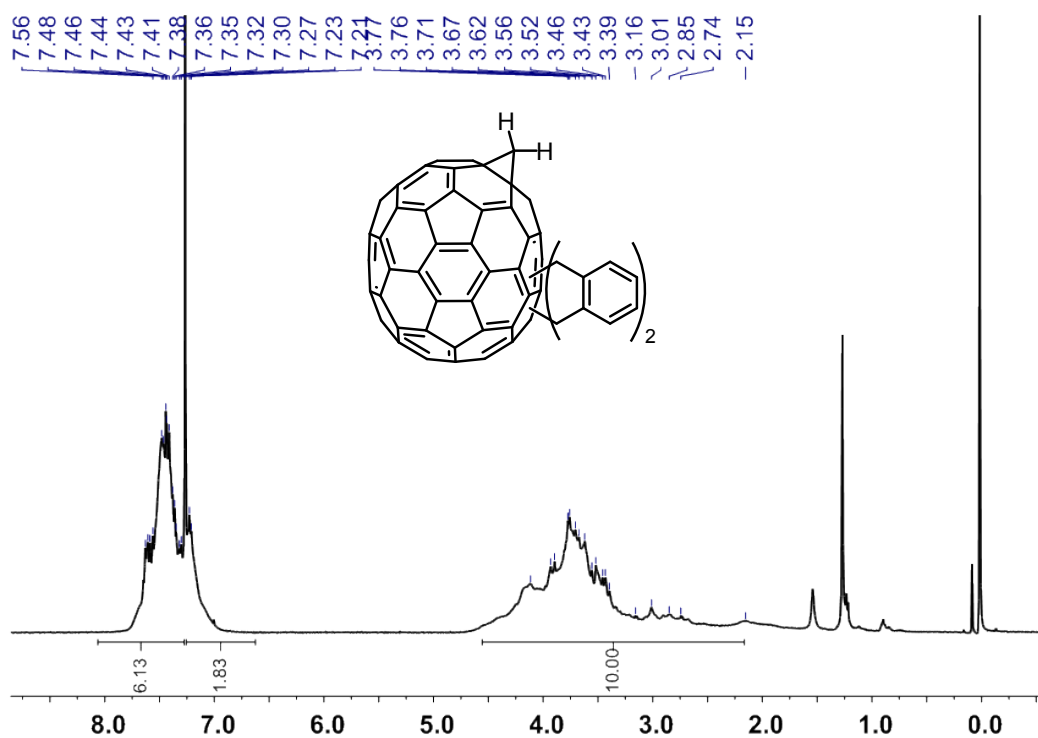

**Figure S2.**  $^1\text{H}$  NMR spectrum for bis-OQMF70 in  $\text{CDCl}_3$ .

## 5. $J$ - $V$ curves

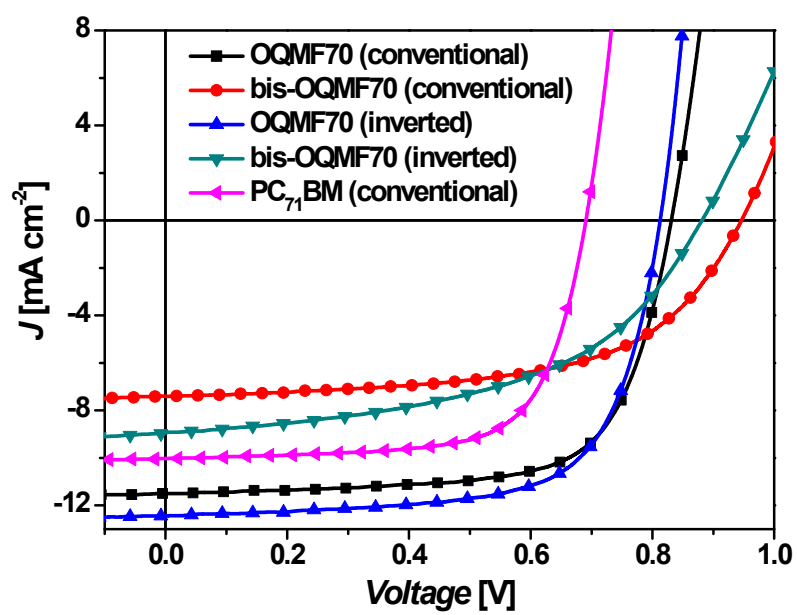

**Figure S3.**  $J$ - $V$  curves for OQMF70:P3HT and bis-OQMF70:P3HT cells (PC<sub>71</sub>BM:P3HT cells shown as reference).

## 6. Space charge limited current (SCLC) measurements

Charge carrier mobility was measured by SCLC method. The mobility was determined by fitting the dark current to the model of a single carrier SCLC, which is described by:

$$J = \frac{9}{8} \varepsilon_0 \varepsilon_r \mu \frac{V^2}{d^3}$$

where  $J$  is the current density,  $\mu$  is the zero-field mobility of electrons,  $\varepsilon_0$  is the permittivity of the vacuum,  $\varepsilon_r$  is the relative permittivity of the material,  $d$  is the thickness of the blend film, and  $V$  is the effective voltage,  $V = V_{\text{appl}} - V_{\text{bi}}$ , where  $V_{\text{appl}}$  is the applied voltage, and  $V_{\text{bi}}$  is the built-in potential determined by electrode workfunction difference. Figure S4 (a) shows  $J$ - $V$  curves for the electron-only devices. The mobility was calculated from the slope of  $J^{1/2}$ - $V$  curves.

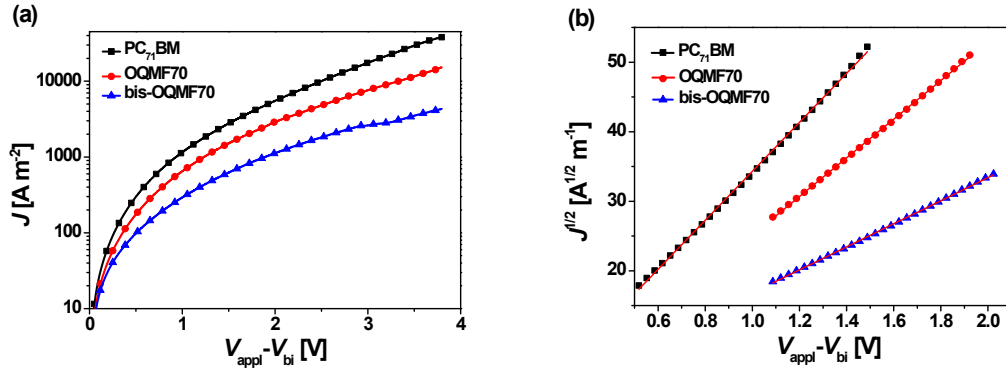

**Figure S4.**  $J$ - $V$  curves (a) and the corresponding  $J^{1/2}$ - $V$  curves (b) for electron-only devices (in dark). The thicknesses for PC<sub>71</sub>BM:P3HT, OQMF70:P3HT and bis-OQMF70:P3HT blend films are 94 nm, 100 nm and 97 nm, respectively.

## 7. External quantum efficiency (EQE) spectra

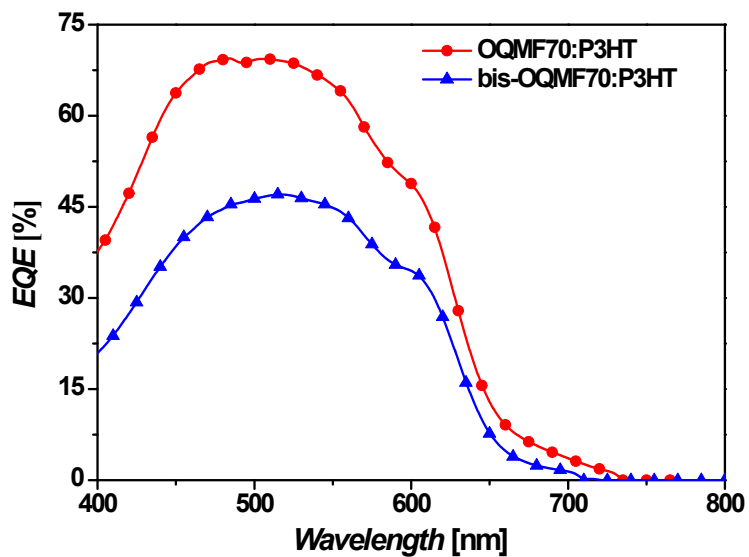

**Figure S5.** EQE spectra for OQMF70:P3HT and bis-OQMF70:P3HT solar cells.

### Reference

- [1] Y. Sun, J. H. Seo, C. J. Takacs, J. Seifter, A. J. Heeger, *Adv. Mater.*, 2011, **23**, 1679.
